# Supplementary material
Source: publisher figshare collection journal article supplement (https://frontiersin.figshare.com/ndownloader/files/14312561)
Supplement: Supplementary file [file 14312561]

**Figure S2. Quantification of targeted mutagenesis of *ALS1* using CRISPR/Cas9 and TALENs in the presence and absence of dsODNs in protoplast transformations.** Reads containing mutagenesis are visualized in multiple sequence alignment. To the left of each sequence, the number of reads and its percentage in the total number of reads are provided. The samples represent three biological replicates and three technical replicates of the PCR for each reagent. No reads containing dsODNs were included in this analysis. For CRISPR and TALENs samples, representative reads having greater than 0.5% and 0.1% of total reads respectively are presented. For CRISPR+ODN, TALENs+ODN and only dsODN samples, reads having greater than 0.05% of total reads are presented.

#### CRISPR 1-1

|            |                                           |
|------------|-------------------------------------------|
| WT         | CACGTTCTACCTATGATTCC-CAGCGGCGGTGCTTTCAAAG |
| 9850-68.28 | CACGTTCTACCTATGATTCC-CAGCGGCGGTGCTTTCAAAG |
| 603-4.18   | CACGTTCTACCTATGA-----CAGCGGCGGTGCTTTCAAAG |
| 603-4.18   | CACGTTCTACCTATGATTC--CAGCGGCGGTGCTTTCAAAG |
| 511-3.54   | -ACGTTCTACCTATGATTCCCCAGCGGCGGTGCTTTCAAAG |
| 355-2.46   | CACGTTCTACCTATG-----CAGCGGCGGTGCTTTCAAAG  |
| 343-2.37   | CACGTTCTACCTATGAC----CAGCGGCGGTGCTTTCAAAG |
| 193-1.33   | CACGTTCTACCTATGC-----CAGCGGCGGTGCTTTCAAAG |
| 149-1.03   | CACGTTCTACCTATGAT----CAGCGGCGGTGCTTTCAAAG |
| 144-0.99   | CACGTTCTACCTATGATT---CAGCGGCGGTGCTTTCAAAG |
| 141-0.97   | CACGTTCTACCTATC-----CAGCGGCGGTGCTTTCAAAG  |
| 125-0.86   | CACGTTCTACCTATGATC---CAGCGGCGGTGCTTTCAAAG |
| 122-0.84   | CACGTTCTACCTATGATTCCACAGCGGCGGTGCTTTCAAAG |
| 94-0.65    | CACGTTCTACCTAT-----CAGCGGCGGTGCTTTCAAAG   |
| 79-0.54    | CACGTTCTACCTAC-----CAGCGGCGGTGCTTTCAAAG   |
|            | *****                                     |

#### CRISPR 1-2

|            |                                            |
|------------|--------------------------------------------|
| WT         | CACGTTCTACCTATGATTCC-CAGCGGCGGTGCTTTCAAAG  |
| 9782-70.19 | CACGTTCTACCTATGATTCC-CAGCGGCGGTGCTTTCAAAG  |
| 568-4.07   | CACGTTCTACCTATGA-----CAGCGGCGGTGCTTTCAAAG  |
| 528-3.78   | -ACGTTCTACCTATGATTCCCCAGCGGCGGTGCTTTCAAAG  |
| 509-3.65   | CACGTTCTACCTATGATTC--CAGCGGCGGTGCTTTCAAAG  |
| 373-2.67   | CACGTTCTACCTATGAC----CAGCGGCGGTGCTTTCAAAG  |
| 279-2.00   | CACGTTCTACCTATG-----CAGCGGCGGTGCTTTCAAAG   |
| 135-0.96   | CACGTTCTACCTATGC-----CAGCGGCGGTGCTTTCAAAG  |
| 113-0.81   | CACGTTCTACCTATGATTCCACAGCGGCGGTGCTTTCAAAG  |
| 109-0.78   | CACGTTCTACCTATGATT---CAGCGGCGGTGCTTTCAAAG  |
| 108-0.77   | CACGTTCTACCTATC-----CAGCGGCGGTGCTTTCAAAG   |
| 107-0.76   | CACGTTCTACCTAT-----CAGCGGCGGTGCTTTCAAAG    |
| 100-0.71   | CACGTTCTACCTATGAT----CAGCGGCGGTGCTTTCAAAG  |
| 81-0.58    | CACGTTCTACCTATGATC---CAGCGGCGGTGCTTTCAAAG  |
| 77-0.55    | CACGTTCTACCTATGATTCCCTCAGCGGCGGTGCTTTCAAAG |
|            | *****                                      |

#### CRISPR 1-3

|            |                                           |
|------------|-------------------------------------------|
| WT         | CACGTTCTACCTATGATTCC-CAGCGGCGGTGCTTTCAAAG |
| 9427-69.90 | CACGTTCTACCTATGATTCC-CAGCGGCGGTGCTTTCAAAG |
| 596-4.41   | CACGTTCTACCTATGATTC--CAGCGGCGGTGCTTTCAAAG |
| 501-3.71   | CACGTTCTACCTATGA-----CAGCGGCGGTGCTTTCAAAG |
| 453-3.35   | -ACGTTCTACCTATGATTCCCCAGCGGCGGTGCTTTCAAAG |
| 282-2.09   | CACGTTCTACCTATGAC----CAGCGGCGGTGCTTTCAAAG |
| 261-1.93   | CACGTTCTACCTATG-----CAGCGGCGGTGCTTTCAAAG  |
| 173-1.28   | CACGTTCTACCTAT-----CAGCGGCGGTGCTTTCAAAG   |
| 166-1.23   | CACGTTCTACCTATGATT---CAGCGGCGGTGCTTTCAAAG |
| 162-1.20   | CACGTTCTACCTATGC-----CAGCGGCGGTGCTTTCAAAG |
| 127-0.94   | CACGTTCTACCTATC-----CAGCGGCGGTGCTTTCAAAG  |
| 124-0.91   | CACGTTCTACCTATGATTCCACAGCGGCGGTGCTTTCAAAG |
| 94-0.69    | CACGTTCTACCTATGAT----CAGCGGCGGTGCTTTCAAAG |
| 90-0.66    | CACGTTCTACCTATGATC---CAGCGGCGGTGCTTTCAAAG |
|            | *****                                     |

## CRISPR 2-1

|            |                                           |
|------------|-------------------------------------------|
| WT         | CACGTTCTACCTATGATTC-CCAGCGGCGGTGCTTTCAAAG |
| 9795-72.34 | CACGTTCTACCTATGATTC-CCAGCGGCGGTGCTTTCAAAG |
| 476-3.51   | CACGTTCTACCTATGATT--CCAGCGGCGGTGCTTTCAAAG |
| 467-3.44   | CACGTTCTACCTATGA-----CAGCGGCGGTGCTTTCAAAG |
| 364-2.68   | -ACGTTCTACCTATGATTCCCCAGCGGCGGTGCTTTCAAAG |
| 288-2.12   | CACGTTCTACCTATG-----CAGCGGCGGTGCTTTCAAAG  |
| 280-2.06   | CACGTTCTACCTATGAC----CAGCGGCGGTGCTTTCAAAG |
| 205-1.51   | CACGTTCTACCTATGC-----CAGCGGCGGTGCTTTCAAAG |
| 160-1.18   | CACGTTCTACCTATC-----CAGCGGCGGTGCTTTCAAAG  |
| 109-0.80   | CACGTTCTACCTAT-----CAGCGGCGGTGCTTTCAAAG   |
| 99-0.73    | CACGTTCTACCTATGAT----CAGCGGCGGTGCTTTCAAAG |
| 84-0.62    | CACGTTCTACCTATGATT---CAGCGGCGGTGCTTTCAAAG |
| 82-0.65    | CACGTTCTACCTATGATC---CAGCGGCGGTGCTTTCAAAG |
|            | *****                                     |

## CRISPR 2-2

|            |                                           |
|------------|-------------------------------------------|
| WT         | CACGTTCTACCTATGATTCC-CAGCGGCGGTGCTTTCAAAG |
| 9595-72.71 | CACGTTCTACCTATGATTCC-CAGCGGCGGTGCTTTCAAAG |
| 523-3.96   | CACGTTCTACCTATGA-----CAGCGGCGGTGCTTTCAAAG |
| 492-3.72   | CACGTTCTACCTATGATTC--CAGCGGCGGTGCTTTCAAAG |
| 361-2.73   | -ACGTTCTACCTATGATTCCCCAGCGGCGGTGCTTTCAAAG |
| 300-2.27   | CACGTTCTACCTATGAC----CAGCGGCGGTGCTTTCAAAG |
| 235-1.78   | CACGTTCTACCTATG-----CAGCGGCGGTGCTTTCAAAG  |
| 139-1.05   | CACGTTCTACCTATGATT---CAGCGGCGGTGCTTTCAAAG |
| 123-0.93   | CACGTTCTACCTATGC-----CAGCGGCGGTGCTTTCAAAG |
| 115-0.87   | CACGTTCTACCTATGATC---CAGCGGCGGTGCTTTCAAAG |
| 107-0.81   | CACGTTCTACCTAT-----CAGCGGCGGTGCTTTCAAAG   |
| 91-0.68    | CACGTTCTACCTATC-----CAGCGGCGGTGCTTTCAAAG  |
| 80-0.60    | CACGTTCTACCTATGATTCCACAGCGGCGGTGCTTTCAA-  |
| 74-0.56    | CACGTTCTACCTATGAT----CAGCGGCGGTGCTTTCAAAG |
|            | *****                                     |

## CRISPR 2-3

|            |                                           |
|------------|-------------------------------------------|
| WT         | CACGTTCTACCTATGATTCCC-AGCGGCGGTGCTTTCAAAG |
| 9607-73.33 | CACGTTCTACCTATGATTCCC-AGCGGCGGTGCTTTCAAAG |
| 552-4.21   | CACGTTCTACCTATGATTCC--AGCGGCGGTGCTTTCAAAG |
| 443-3.38   | CACGTTCTACCTATGAC-----AGCGGCGGTGCTTTCAAAG |
| 353-2.69   | -ACGTTCTACCTATGATTCCCCAGCGGCGGTGCTTTCAAAG |
| 261-1.99   | CACGTTCTACCTATGC-----AGCGGCGGTGCTTTCAAAG  |
| 192-1.46   | CACGTTCTACCTATGACC---AGCGGCGGTGCTTTCAAAG  |
| 111-0.84   | CACGTTCTACCTATGATTC---AGCGGCGGTGCTTTCAAAG |
| 107-0.81   | CACGTTCTACCTATGCC-----AGCGGCGGTGCTTTCAAAG |
| 101-0.77   | CACGTTCTACCTATCC-----AGCGGCGGTGCTTTCAAAG  |
| 99-0.75    | CACGTTCTACCTAT-C-----AGCGGCGGTGCTTTCAAAG  |
| 87-0.66    | CACGTTCTACCTATGATTCACAGCGGCGGTGCTTTCAA-   |
| 86-0.65    | CACGTTCTACCTATGATCC---AGCGGCGGTGCTTTCAAAG |
|            | *****                                     |

## CRISPR 3-1

|             |                                           |
|-------------|-------------------------------------------|
| WT          | CACGTTCTACCTATGATTCC-CAGCGGCGGTGCTTTCAAAG |
| 14088-73.80 | CACGTTCTACCTATGATTCC-CAGCGGCGGTGCTTTCAAAG |
| 687-3.59    | CACGTTCTACCTATGA-----CAGCGGCGGTGCTTTCAAAG |
| 647-3.38    | CACGTTCTACCTATGATTC--CAGCGGCGGTGCTTTCAAAG |
| 506-2.65    | -ACGTTCTACCTATGATTCCCCAGCGGCGGTGCTTTCAAAG |
| 395-2.06    | CACGTTCTACCTATGAC----CAGCGGCGGTGCTTTCAAAG |
| 340-1.78    | CACGTTCTACCTATG-----CAGCGGCGGTGCTTTCAAAG  |
| 201-1.05    | CACGTTCTACCTATGC-----CAGCGGCGGTGCTTTCAAAG |
| 184-0.96    | CACGTTCTACCTATGATT---CAGCGGCGGTGCTTTCAAAG |
| 147-0.77    | CACGTTCTACCTATC-----CAGCGGCGGTGCTTTCAAAG  |
| 138-0.72    | CACGTTCTACCTATGAT----CAGCGGCGGTGCTTTCAAAG |
| 134-0.70    | CACGTTCTACCTAT-----CAGCGGCGGTGCTTTCAAAG   |
| 119-0.62    | CACGTTCTACCTATGATTCCACAGCGGCGGTGCTTTCAA-  |
| 117-0.61    | CACGTTCTACCTATGATC---CAGCGGCGGTGCTTTCAAAG |
|             | *****                                     |

### CRISPR 3-2

|             |                                                   |
|-------------|---------------------------------------------------|
| WT          | CACGTTCTACCTATGATTCC-CAGCGGCGGTGCTTTCAAAG         |
| 13292-72.42 | CACGTTCTACCTATGATTCC-CAGCGGCGGTGCTTTCAAAG         |
| 709-3.86    | CACGTTCTACCTATGA-----CAGCGGCGGTGCTTTCAAAG         |
| 638-3.47    | CACGTTCTACCTATGATTCC--CAGCGGCGGTGCTTTCAAAG        |
| 460-2.50    | -ACGTTCTACCTATGATTCCCCAGCGGCGGTGCTTTCAAAG         |
| 410-2.23    | CACGTTCTACCTATG-----CAGCGGCGGTGCTTTCAAAG          |
| 380-2.07    | CACGTTCTACCTATGAC----CAGCGGCGGTGCTTTCAAAG         |
| 221-1.20    | CACGTTCTACCTATGC-----CAGCGGCGGTGCTTTCAAAG         |
| 196-1.06    | CACGTTCTACCTATGATT---CAGCGGCGGTGCTTTCAAAG         |
| 166-0.90    | CACGTTCTACCTATC-----CAGCGGCGGTGCTTTCAAAG          |
| 144-0.78    | CACGTTCTACCTATGAT----CAGCGGCGGTGCTTTCAAAG         |
| 128-0.69    | CACGTTCTACCTAT-----CAGCGGCGGTGCTTTCAAAG           |
| 126-0.68    | CACGTTCTACCTATGATC---CAGCGGCGGTGCTTTCAAAG         |
| 126a-0.68   | CACGTTCTACCTATGATTCCACAGCGGCGGTGCTTTCAA-<br>***** |

### CRISPR 3-3

|             |                                                   |
|-------------|---------------------------------------------------|
| WT          | CACGTTCTACCTATGATTCCC-AGCGGCGGTGCTTTCAAAG         |
| 17942-74.31 | CACGTTCTACCTATGATTCCC-AGCGGCGGTGCTTTCAAAG         |
| 813-3.36    | CACGTTCTACCTATGATTCC--AGCGGCGGTGCTTTCAAAG         |
| 805-3.33    | CACGTTCTACCTATGAC-----AGCGGCGGTGCTTTCAAAG         |
| 630-2.6     | -ACGTTCTACCTATGATTCCCCAGCGGCGGTGCTTTCAAAG         |
| 433-1.79    | CACGTTCTACCTATGC-----AGCGGCGGTGCTTTCAAAG          |
| 379-1.56    | CACGTTCTACCTATGACC---AGCGGCGGTGCTTTCAAAG          |
| 294-1.21    | CACGTTCTACCTATGCC-----AGCGGCGGTGCTTTCAAAG         |
| 242-1.00    | CACGTTCTACCTATGATTC---AGCGGCGGTGCTTTCAAAG         |
| 222-0.91    | CACGTTCTACCTATCC-----AGCGGCGGTGCTTTCAAAG          |
| 197-0.81    | CACGTTCTACCTAT-C-----AGCGGCGGTGCTTTCAAAG          |
| 178-0.73    | CACGTTCTACCTATGATCC---AGCGGCGGTGCTTTCAAAG         |
| 158-0.65    | CACGTTCTACCTATGATTCCACAGCGGCGGTGCTTTCAA-<br>***** |

### CRISPR+ODN 1-1

|             |                                                          |
|-------------|----------------------------------------------------------|
| WT          | CACGTTCTACCTATGATTCCCAGCGGCGGTGCTTTCAAAG                 |
| 12115-96.73 | CACGTTCTACCTATGATTCCCAGCGGCGGTGCTTTCAAAG                 |
| 20-0.15     | CACGTTCTACCTATGATTCC-AGCGGCGGTGCTTTCAAAG                 |
| 13-0.10     | CACGTTCTGCCTATGATTCCCAGCGGCGGTGCTTTCAAAG                 |
| 11a-0.08    | CACGTTCTACCCATGATTCCCAGCGGCGGTGCTTTCAAAG                 |
| 11-0.08     | CACGTTCTACCTATGATTCCCAGCGGCAGTGCTTTCAAAG                 |
| 10-0.07     | CACGTTCTACCTATGATTCCCAGCGGCGGTGCTTTCAAAG                 |
| 9-0.07      | CACGTTCTACCTATGATTCCCAGCGGCGGTGCTTTCAAAG                 |
| 9-0.07      | CACGTTCTACCTATGATTCCAGCGGCGGTGCTTTCAAAG                  |
| 8-0.06      | CACGTTCTACCTATGATTCCCAGCGGCGGTACTTTCAAAG                 |
| 8-0.06      | CATATGTTAATAACGGTATCCAGCGGCGGTGCTTTCAAAG                 |
| 7-0.05      | CACGTTCTACCTATGATTCCCAGCGGCGGTGCTTGCAAAG                 |
| 7-0.05      | CACGTTCTACCTATGATTCCCAGCGGCGGTGCGTTCAAAG                 |
| 7-0.05      | CACGTTCTACCTGTGATTCCCAGCGGCGGTGCTTTCAAAG<br>** * * * * * |

### CRISPR+ODN 1-2

|             |                                                         |
|-------------|---------------------------------------------------------|
| WT          | CACGTTCTACCTATGATTCCC-AGCGGCGGTGCTTTCAAAG               |
| 10755-97.11 | CACGTTCTACCTATGATTCCC-AGCGGCGGTGCTTTCAAAG               |
| 21-0.18     | -ACGTTCTACCTATGATTCCCCAGCGGCGGTGCTTTCAAAG               |
| 21a-0.18    | -ATATGACAACTCAATTAAACCAGCGGCGGTGCTTTCAAAG               |
| 11-0.09     | CACGTTCTACCTATGATTCC-----GGCGGTGCTTTCAAAG               |
| 8-0.07      | CACGTTCTACCTATGATTCCC-GGCGGCGGTGCTTTCAAAG               |
| 7-0.06      | CACGTTCTACCTATGATTCCC-AGCGGCTGTGCTTTCAAAG               |
| 6-0.05      | CACGTTCTACCTATGATTCCC-AGCGGCGGTGCTTTCAAAG               |
| 6-0.05      | CACGTTCTACCTATGATTCCC-AGCGGCGGTGCTTGCAAAG               |
| 6-0.05      | CACGTTCTACCTATGATTCCCT-AGCGGCGGTGCTTTCAAAG<br>* * * * * |

### CRISPR+ODN 1-3

|             |                                          |
|-------------|------------------------------------------|
| WT          | CACGTTCTACCTATGATTCCCAGCGGCGGTGCTTTCAAAG |
| 11919-96.92 | CACGTTCTACCTATGATTCCCAGCGGCGGTGCTTTCAAAG |

|         |                                          |
|---------|------------------------------------------|
| 24-0.19 | CACGTTCTACCTATGATTC-CAGCGGCGGTGCTTTCAAAG |
| 17-0.13 | CACGTTCTACCTATGATTCCCAGCGGCTGTGCTTTCAAAG |
| 12-0.09 | CACGTTCTACCTAT-----CCAGCGGCGGTGCTTTCAAAG |
| 10-0.08 | CACGTTCTACCTATAAATCCCAGCGGCGGTGCTTTCAAAG |
| 7-0.05  | CACGTTCTACCTATGATTCCCTGCGGCGGTGCTTTCAAAG |
| 7-0.05  | CACGTTCTACCCATGATTCCCAGCGGCGGTGCTTTCAAAG |
| 7-0.05  | CACGTTCTACCTATGATTCTCAGCGGCGGTGCTTTCAAAG |
| 7-0.05  | CACGTTCTACCTATGATTCCCAGCGGCGGTCTTTCAAAG  |
|         | ***** ** * *****                         |

#### CRISPR+ODN 2-1

|             |                                            |
|-------------|--------------------------------------------|
| WT          | -CACGTTCTACCTATGATTCCCAGCGGCGGTGCTTTCAAAG  |
| 15047-95.55 | -CACGTTCTACCTATGATTCCCAGCGGCGGTGCTTTCAAAG  |
| 26-0.16     | -CACGTTCTACCTATGATTCC-AGCGGCGGTGCTTTCAAAG  |
| 18-0.11     | -CACGTTCTACCTATGATTCCCAGCGGCGGTACTTTCAAAG  |
| 14-0.08     | -CACGTTCTGCCTATGATTCCCAGCGGCGGTGCTTTCAAAG  |
| 10-0.06     | -CACGTTCTACCTATGATTCCCAGCGGCGGTCTTTCAAAG   |
| 10-0.06     | -CACGTTCTACCTATGATTCCCAGCAGCGGTGCTTTCAAAG  |
| 9-0.05      | -CACGTTCTACCTATGATTCCCTAGCGGCGGTGCTTTCAAAG |
| 9-0.05      | -CACGTTCTACCTATGATTCCCAGCGGCGGTGCCTTCAAAG  |
| 8-0.05      | ATATGACAACTCAATTAACC-AGCGGCGGTGCTTTCAAAG   |
| 8-0.05      | -CACGTTCTACCTAT-----CAGCGGCGGTGCTTTCAAAG   |
| 8-0.05      | ATATGACAACTCAATTAACC-AGCGGCGGTGCTTTCAAAG   |
| 8-0.05      | -CACGTTCTACCTATGATTCCCAGTGGCGGTGCTTTCAAAG  |
|             | * * * * *                                  |

#### CRISPR+ODN 2-2

|             |                                            |
|-------------|--------------------------------------------|
| WT          | -CACGTTCTACCTATGATTCCCAGCGGCGGTGCTTTCAAAG  |
| 12439-96.30 | -CACGTTCTACCTATGATTCCCAGCGGCGGTGCTTTCAAAG  |
| 25-0.19     | ATATGACAACTCAATTAACC-CCAGCGGCGGTGCTTTCAAAG |
| 12-0.09     | -CACGTTCTACCTATGATT-CCAGCGGCGGTGCTTTCAAAG  |
| 10-0.07     | -CACGTTCTGCCTATGATTCCCAGCGGCGGTGCTTTCAAAG  |
| 10-0.07     | -CACGTTCTACCTATGATTCCCGGCGGCGGTGCTTTCAAAG  |
| 9-0.06      | -CACGTTCTACCTA-----CAGCGGCGGTGCTTTCAAAG    |
| 9-0.06      | -CACGTTCTACCTATGATTCCCAGCGGCGGTGCGTTCAAAG  |
| 8-0.06      | -CACGTTCTACCTATGATTTCCAGCGGCGGTGCTTTCAAAG  |
| 8-0.06      | -CACGTTCTACCTATGATTCCCAGCGGCGGTGCCTTCAAAG  |
| 8-0.06      | -CACGTTCTACCTATAAATCCCAGCGGCGGTGCTTTCAAAG  |
| 8-0.06      | -CACGTTCTACCTATGATTCCCAGCGGCAGTGCTTTCAAAG  |
| 8-0.06      | -CACGTTCTATCTATGATTCCCAGCGGCGGTGCTTTCAAAG  |
| 7-0.05      | -CACGTTCTACCTATGATTCCCAGCGGCGGTGATTTCAAAG  |
| 7-0.05      | -CACGTTCTACCTATGATTCCCAGCGGCGGTGCTATCAAAG  |
|             | * * * * *                                  |

#### CRISPR+ODN 2-3

|             |                                           |
|-------------|-------------------------------------------|
| WT          | CACGTTCTACCTATGATTCCC-AGCGGCGGTGCTTTCAAAG |
| 14639-96.88 | CACGTTCTACCTATGATTCCC-AGCGGCGGTGCTTTCAAAG |
| 31-0.20     | -ATATGACAACTCAATTAACCAGCGGCGGTGCTTTCAAAG  |
| 15-0.09     | CACGTTCTACCTATGATTCC--AGCGGCGGTGCTTTCAAAG |
| 13-0.08     | CACGTTCTGCCTATGATTCCC-AGCGGCGGTGCTTTCAAAG |
| 12-0.07     | -ACGTTCTACCTATGATTCCCCAGCGGCGGTGCTTTCAAAG |
| 11-0.07     | CACGTTCTACCTATGATTCCC-GGCGGCGGTGCTTTCAAAG |
| 9-0.05      | CACGTTCTACCTATGATTCCC-AGCGGCGGTGCTTGCAAAG |
| 9-0.05      | CACGTTCTACCTATGATTCCC-AGCGGCGATGCTTTCAAAG |
| 8-0.05      | CACGTTCTACCTATGATTCCC-AGCGGCGGTACTTTCAAAG |
| 8-0.05      | CACGTTCTACCTATGATTCCC-AGCGGCGGTGCCTTCAAAG |
|             | * * * * *                                 |

#### CRISPR+ODN 3-1

|             |                                           |
|-------------|-------------------------------------------|
| WT          | CACGTTCTACCTATGATTCCCAGCGGCGGTGCTTTCAAAG  |
| 16038-96.25 | CACGTTCTACCTATGATTCCCAGCGGCGGTGCTTTCAAAG  |
| 19-0.11     | CACGTTCTACCTATGATTCCCAGCGGCGGTGCTTGCAAAG  |
| 15-0.09     | CACGTTCTACCTATGATTCCCAGCGGCGGTCTTTCAAAG   |
| 14-0.08     | CACGTTCTACCTATGATTCCCAGCGGCAGTGCTTTCAAAG  |
| 14-0.08     | CACGTTCTGCCTATGATTCCCAGCGGCGGTGCTTTCAAAG  |
| 12-0.07     | CACGTTCTACCTATGATTCCCAGCGGCGGTACTTTCAAAG  |
| 10-0.06     | CACGTTCTACCTATGATTCCCTAGCGGCGGTGCTTTCAAAG |

|        |                                          |
|--------|------------------------------------------|
| 9-0.05 | CACGTTCTACCTATGATTC-----GGCGGTGCTTTCAAAG |
| 9-0.05 | CACGTTCTACCTGTGATTCCCAGCGGCGGTGCTTTCAAAG |
| 9-0.05 | CACGTTCTACCTATGATTCCCAGCGGCGATGCTTTCAAAG |
|        | ***** ** *                               |

### CRISPR+ODN 3-2

|             |                                          |
|-------------|------------------------------------------|
| WT          | CACGTTCTACCTATGATTCCCAGCGGCGGTGCTTTCAAAG |
| 13059-96.85 | CACGTTCTACCTATGATTCCCAGCGGCGGTGCTTTCAAAG |
| 12-0.08     | CACGTTCTACCTATGATTCCCAGCGGCGGTGCTTTCAAAG |
| 10-0.07     | CACGTTCTGCCTATGATTCCCAGCGGCGGTGCTTTCAAAG |
| 10-0.07     | CACGTTCTACCTATGATTCCCAGCGGCGGTGCTTTCAAAG |
| 9-0.06      | CACGTTCTACCTATGATTCCCAGCGGCGGTGCTTTCAAAG |
| 8-0.05      | CACGTTCTACCTATGATTCCCAGCAGCGGTGCTTTCAAAG |
| 8-0.05      | CACGTTCTACCTATGATT-CCAGCGGCGGTGCTTTCAAAG |
| 7-0.05      | CACGTTCTACCTATGATTCCCTGCGGCGGTGCTTTCAAAG |
|             | ***** ***** ** * *                       |

### CRISPR+ODN 3-3

|             |                                            |
|-------------|--------------------------------------------|
| WT          | CACGTTCTACCTATGATTCCCAGCGGCGGTGCTTTCAAAG   |
| 12171-97.08 | CACGTTCTACCTATGATTCCCAGCGGCGGTGCTTTCAAAG   |
| 16-0.12     | CACGTTCTGCCTATGATTCCCAGCGGCGGTGCTTTCAAAG   |
| 10-0.07     | CACGTTCTACCTATGATTCCCAGCGGCGGTGCTTTCAAAG   |
| 9-0.07      | CACGTTCTACCCATGATTCCCAGCGGCGGTGCTTTCAAAG   |
| 8-0.06      | CACGTTCTACCTATGATTCCCAGCGGCGGTGCTTTCAAAG   |
| 8-0.06      | CACGTTCTACCTATGATTCCCAGCGGCGGTACTTTCAAAG   |
| 8-0.06      | CACGTTCTACCTATGATTCCCAGTGCGGCGGTGCTTTCAAAG |
| 7-0.05      | CACGTTCTACCTATAATTCCCAGCGGCGGTGCTTTCAAAG   |
| 7-0.05      | CACGTTCTACCTGTGATTCCCAGCGGCGGTGCTTTCAAAG   |
|             | ***** ** * ***** *                         |

### TALENs 1-1

|             |                                          |
|-------------|------------------------------------------|
| WT          | CACGTTCTACCTATGATTCCCAGCGGCGGTGCTTTCAAAG |
| 12022-87.36 | CACGTTCTACCTATGATTCCCAGCGGCGGTGCTTTCAAAG |
| 528-3.83    | CACGTTCTACCTA---TCCCAGCGGCGGTGCTTTCAAAG  |
| 174-1.26    | CACGTTCTACCTA--ATTCCCAGCGGCGGTGCTTTCAAAG |
| 124-0.90    | CACGTTCTACCTT----TCCCAGCGGCGGTGCTTTCAAAG |
| 54-0.39     | CACGTTCTACCT----TCCCAGCGGCGGTGCTTTCAAAG  |
| 46-0.33     | CACGTTCTACCTG--ATTCCCAGCGGCGGTGCTTTCAAAG |
| 26-0.18     | CACGTTCTACCAT----TCCCAGCGGCGGTGCTTTCAAAG |
| 19-0.13     | CACGTTCTACCTA----TCCCAGCGGCGGTGCTTTCAAAG |
| 15-0.10     | CACGTTCTACCTA--TTTCCCAGCGGCGGTGCTTTCAAAG |
| 14-0.10     | CACGTTCTACCT-----TCCCAGCGGCGGTGCTTTCAAAG |
|             | ***** *****                              |

### TALENs 1-2

|             |                                          |
|-------------|------------------------------------------|
| WT          | CACGTTCTACCTATGATTCCCAGCGGCGGTGCTTTCAAAG |
| 12586-88.67 | CACGTTCTACCTATGATTCCCAGCGGCGGTGCTTTCAAAG |
| 460-3.24    | CACGTTCTACCTA---TCCCAGCGGCGGTGCTTTCAAAG  |
| 108-0.76    | CACGTTCTACCTA--ATTCCCAGCGGCGGTGCTTTCAAAG |
| 76-0.53     | CACGTTCTACCTT----TCCCAGCGGCGGTGCTTTCAAAG |
| 44-0.30     | CACGTTCTACCTG--ATTCCCAGCGGCGGTGCTTTCAAAG |
| 36-0.25     | CACGTTCTACCAT----TCCCAGCGGCGGTGCTTTCAAAG |
| 30-0.21     | CACGTTCTACCT----TCCCAGCGGCGGTGCTTTCAAAG  |
| 29-0.20     | CACGTTCTACCTA----TCCCAGCGGCGGTGCTTTCAAAG |
| 23-0.16     | CACGTTCTACCTA--TTTCCCAGCGGCGGTGCTTTCAAAG |
| 16-0.11     | CACGTTCTACCT-----TCCCAGCGGCGGTGCTTTCAAAG |
|             | ***** *****                              |

### TALENs 1-3

|             |                                          |
|-------------|------------------------------------------|
| WT          | CACGTTCTACCTATGATTCCCAGCGGCGGTGCTTTCAAAG |
| 12362-88.45 | CACGTTCTACCTATGATTCCCAGCGGCGGTGCTTTCAAAG |
| 435-3.11    | CACGTTCTACCTA---TCCCAGCGGCGGTGCTTTCAAAG  |
| 141-1.00    | CACGTTCTACCTA--ATTCCCAGCGGCGGTGCTTTCAAAG |
| 116-0.83    | CACGTTCTACCT----TCCCAGCGGCGGTGCTTTCAAAG  |
| 33-0.23     | CACGTTCTACCT----TCCCAGCGGCGGTGCTTTCAAAG  |
| 28-0.20     | CACGTTCTACCTG--ATTCCCAGCGGCGGTGCTTTCAAAG |

|         |                                         |
|---------|-----------------------------------------|
| 27-0.19 | CACGTTCTACCA----TTCCAGCGGCGGTGCTTTCAAAG |
| 19-0.13 | CACGTTCTACCT----ATCCAGCGGCGGTGCTTTCAAAG |
| 18-0.12 | CACGTTCTACCTA--TTCCAGCGGCGGTGCTTTCAAAG  |
| 14-0.10 | CACGTTCTACAT-----TCCAGCGGCGGTGCTTTCAAAG |
|         | *****                                   |

# TALENs 2-1

|            |                                          |
|------------|------------------------------------------|
| WT         | CACGTTCTACCTATGATTCCCAGCGGCGGTGCTTTCAAAG |
| 8586-84.75 | CACGTTCTACCTATGATTCCCAGCGGCGGTGCTTTCAAAG |
| 475-4.68   | CACGTTCTACCTA---TTCCAGCGGCGGTGCTTTCAAAG  |
| 132-1.30   | CACGTTCTACCTA--ATTCCAGCGGCGGTGCTTTCAAAG  |
| 82-0.80    | CACGTTCTACCT----TTCCAGCGGCGGTGCTTTCAAAG  |
| 48-0.47    | CACGTTCTACCTG--ATTCCAGCGGCGGTGCTTTCAAAG  |
| 28-0.27    | CACGTTCTAC-----CTCCAGCGGCGGTGCTTTCAAAG   |
| 22-0.21    | -----CACGTT--CTACCCAGCGGCGGTGCTTTCAAAG   |
| 19-0.18    | CACGTTCTACCTA--TTCCAGCGGCGGTGCTTTCAAAG   |
| 16-0.15    | -----CACGTT--ATTCCAGCGGCGGTGCTTTCAAAG    |
| 13-0.12    | CACGTTCTACCT----ATCCAGCGGCGGTGCTTTCAAAG  |
| 13-0.12    | -ACGTTCTACCTAGATTCCCAGCGGCGGTGCTTTCAAAG  |
| 12-0.11    | CACGTTCTACCTA-----GGCGGTGCTTTCAAAG       |
| 12-0.11    | CACGTTCTACCTATGATTCCCAGCGGCGGTGCTTTCAAAG |
| 11-0.10    | CACGTTCTGCCTATGATTCCCAGCGGCGGTGCTTTCAAAG |
|            | *                 *****                  |

# TALENs 2-2

|            |                                          |
|------------|------------------------------------------|
| WT         | CACGTTCTACCTATGATTCCCAGCGGCGGTGCTTTCAAAG |
| 9307-86.85 | CACGTTCTACCTATGATTCCCAGCGGCGGTGCTTTCAAAG |
| 377-3.51   | CACGTTCTACCT---ATTCCAGCGGCGGTGCTTTCAAAG  |
| 112-1.04   | CACGTTCTACCT--AATTCCAGCGGCGGTGCTTTCAAAG  |
| 102-0.95   | CACGTTCTACCT----TTCCAGCGGCGGTGCTTTCAAAG  |
| 69-0.64    | CACGTTCTACCT----ATCCAGCGGCGGTGCTTTCAAAG  |
| 42-0.39    | CACGTTCTACCT----ATCCAGCGGCGGTGCTTTCAAAG  |
| 33-0.30    | CACGTTCTACCT--GATTCCAGCGGCGGTGCTTTCAAAG  |
| 24-0.22    | CACGTTCTACCT-----CCAGCGGCGGTGCTTTCAAAG   |
| 18-0.16    | CACGTTCTACCA----TTCCAGCGGCGGTGCTTTCAAAG  |
| 14-0.13    | -ACGTTCTACCT-TATTCCAGCGGCGGTGCTTTCAAAG   |
|            | *****                 *****              |

# TALENs 2-3

|            |                                            |
|------------|--------------------------------------------|
| WT         | CACGTTCTACCTATGATTCCCAGCGGCGGTGCTTTCAAAG   |
| 5112-84.80 | CACGTTCTACCTATGATTCCCAGCGGCGGTGCTTTCAAAG   |
| 305-5.05   | CACGTTCTACCT---ATTCCAGCGGCGGTGCTTTCAAAG    |
| 69-1.14    | CACGTTCTACCT----TTCCAGCGGCGGTGCTTTCAAAG    |
| 64-1.06    | CACGTTCTACCTA--ATTCCAGCGGCGGTGCTTTCAAAG    |
| 30-0.49    | CACGTTCTACCTG--ATTCCAGCGGCGGTGCTTTCAAAG    |
| 16-0.26    | CACGTTCTACCT-----TTCCAGCGGCGGTGCTTTCAAAG   |
| 13-0.21    | CACGTTCTACCA----TTCCAGCGGCGGTGCTTTCAAAG    |
| 10-0.16    | CACGTTCTA-----TTCCAGCGGCGGTGCTTTCAAAG      |
| 9-0.14     | CACGTTCTACC-----TACCAGCGGCGGTGCTTTCAAAG    |
| 9-0.14     | CACGTTCTACC-----TATGAGCGGCGGTGCTTTCAAAG    |
| 8-0.13     | CACGTTCTACCTATGATTCCCAGCGGTGGTGTGCTTTCAAAG |
| 8-0.13     | CACGTTCTACC-----TCCAGCGGCGGTGCTTTCAAAG     |
| 8-0.13     | CACGTTCTA-----CAGCGGCGGTGCTTTCAAAG         |
|            | *****                 *****                |

# TALENs 3-1

|             |                                          |
|-------------|------------------------------------------|
| WT          | CACGTTCTACCTATGATTCCCAGCGGCGGTGCTTTCAAAG |
| 39483-85.96 | CACGTTCTACCTATGATTCCCAGCGGCGGTGCTTTCAAAG |
| 1915-4.16   | CACGTTCTACCT---ATTCCAGCGGCGGTGCTTTCAAAG  |
| 530-1.15    | CACGTTCTACCT--AATTCCAGCGGCGGTGCTTTCAAAG  |
| 475-1.03    | CACGTTCTACCT----TTCCAGCGGCGGTGCTTTCAAAG  |
| 179-0.38    | CACGTTCTACCT--GATTCCAGCGGCGGTGCTTTCAAAG  |
| 142-0.30    | CACGTTCTACCT-----TCCAGCGGCGGTGCTTTCAAAG  |
| 120-0.26    | CACGTTCTACCT-----TCCAGCGGCGGTGCTTTCAAAG  |
| 89-0.19     | CACGTTCTACCA----TTCCAGCGGCGGTGCTTTCAAAG  |
| 53-0.11     | CACGTTCTACCT---ATCCAGCGGCGGTGCTTTCAAAG   |
|             | *****                 *****              |

### TALENs 3-2

|             |                                          |
|-------------|------------------------------------------|
| WT          | CACGTTCTACCTATGATTCCCAGCGGCGGTGCTTTCAAAG |
| 11661-85.11 | CACGTTCTACCTATGATTCCCAGCGGCGGTGCTTTCAAAG |
| 610-4.45    | CACGTTCTACCTAT---TCCCAGCGGCGGTGCTTTCAAAG |
| 177-1.29    | CACGTTCTACCTA--ATTCCCAGCGGCGGTGCTTTCAAAG |
| 128-0.93    | CACGTTCTACCTTT-----CCAGCGGCGGTGCTTTCAAAG |
| 74-0.54     | CACGTTCTACCTG--ATTCCCAGCGGCGGTGCTTTCAAAG |
| 72-0.52     | CACGTTCTACCTT-----CCAGCGGCGGTGCTTTCAAAG  |
| 39-0.28     | CACGTTCTACCAT---CCAGCGGCGGTGCTTTCAAAG    |
| 29-0.21     | CACGTTCTACCTAT--TTCCCAGCGGCGGTGCTTTCAAAG |
| 26-0.18     | CACGTTCTACCTCC-----CAGCGGCGGTGCTTTCAAAG  |
| 14-0.10     | CACGTTCTACCT-----CGGTGCTTTCAAAG          |
|             | ***** ; *****                            |

### TALENs 3-3

|          |                                          |
|----------|------------------------------------------|
| WT       | CACGTTCTACCTATGATTCCCAGCGGCGGTGCTTTCAAAG |
| 9739     | CACGTTCTACCTATGATTCCCAGCGGCGGTGCTTTCAAAG |
| 444-3.92 | CACGTTCTACCT---TATCCCAGCGGCGGTGCTTTCAAAG |
| 113-1.00 | CACGTTCTACCTT---TCCCAGCGGCGGTGCTTTCAAAG  |
| 93-0.82  | CACGTTCTACCTA--ATTCCCAGCGGCGGTGCTTTCAAAG |
| 37-0.32  | CACGTTCTACCTG--ATTCCCAGCGGCGGTGCTTTCAAAG |
| 27-0.24  | CACGTTCTACCT-----TCCCAGCGGCGGTGCTTTCAAAG |
| 13-0.11  | CACGTTCTACCT---GATCCCAGCGGCGGTGCTTTCAAAG |
| 13-0.11  | CACGTTCTA-----ATTCCCAGCGGCGGTGCTTTCAAAG  |
| 13-0.11  | CACGTTCTGCCTATGATTCCCAGCGGCGGTGCTTTCAAAG |
| 13-0.11  | CACGTTCTACCAT---TCCCAGCGGCGGTGCTTTCAAAG  |
| 13-0.11  | CACGTTCTACCTA---TCCCAGCGGCGGTGCTTTCAAAG  |
| 12-0.10  | CACGTTCTACCTA--TTCCCAGCGGCGGTGCTTTCAAAG  |
|          | ***** *****                              |

### TALENs+ODN 1-1

|            |                                          |
|------------|------------------------------------------|
| WT         | CACGTTCTACCTATGATTCCCAGCGGCGGTGCTTTCAAAG |
| 8155-96.61 | CACGTTCTACCTATGATTCCCAGCGGCGGTGCTTTCAAAG |
| 15-0.17    | CACGTTCTACCT---ATTCCCAGCGGCGGTGCTTTCAAAG |
| 6-0.07     | CACGTTCTACCTATGATACCCAGCGGCGGTGCTTTCAAAG |
| 6-0.07     | CACGTTCTAACTATGATTCCCAGCGGCGGTGCTTTCAAAG |
| 6-0.07     | CACGTTCCACCTATGATTCCCAGCGGCGGTGCTTTCAAAG |
| 5-0.05     | CACGTTCTACCTATGATTCCCAGCGGCGGTGCTTTCAAAG |
| 5-0.05     | CACGTTCTACCTAGGATTCCCAGCGGCGGTGCTTTCAAAG |
|            | ***** * * * * * * * * * * * * * * * *    |

### TALENs+ODN 1-2

|            |                                          |
|------------|------------------------------------------|
| WT         | CACGTTCTACCTATGATTCCCAGCGGCGGTGCTTTCAAAG |
| 7391-96.13 | CACGTTCTACCTATGATTCCCAGCGGCGGTGCTTTCAAAG |
| 11-0.14    | CACGTTCTGCCTATGATTCCCAGCGGCGGTGCTTTCAAAG |
| 8-0.10     | CACGTTCTACCTATGATTCCCAGCGGCGGTGCTTTCAAAG |
| 7-0.09     | CACGTTCTACCTA-----GCGGCGGTGCTTTCAAAG     |
| 7-0.09     | CACGTTCTACCT---ATTCCCAGCGGCGGTGCTTTCAAAG |
| 6-0.07     | CACGTTCTACCTATGATTCCCAGCGGCGGTGCTTTCAAAG |
| 6-0.07     | CACGTTCTACCTATGATTCTAGCGGCGGTGCTTTCAAAG  |
| 6-0.07     | CACGTTCTACCTG--ATTCCCAGCGGCGGTGCTTTCAAAG |
| 5-0.06     | CACGTTCTACCTAT-----CCAGCGGCGGTGCTTTCAAAG |
| 5-0.06     | CACGTTCTACCTA-----TGCGGTGCTTTCAAAG       |
| 5-0.06     | CACGTTCTACCTATGATTCCCGCGGCGGTGCTTTCAAAG  |
| 5-0.06     | CACGTTCTACCTATGATTCCCAGCGGCGGTGCTTTCAAAG |
| 4-0.04     | CACGTTCTACCTATGATTCCCAGTGGCGGTGCTTTCAAAG |
| 4-0.04     | CACGTTCTACCTA--ATTCCCAGCGGCGGTGCTTTCAAAG |
| 4-0.04     | CACGTTCTACCTA-----CTTTCAAAG              |
| 4-0.04     | CACGTTCTACCTATGATTCCCAGCAGCGGTGCTTTCAAAG |
| 4-0.04     | CACGTTCTACCTATAATTCCCAGCGGCGGTGCTTTCAAAG |
| 4-0.04     | CACGTTCTAACTATGATTCCCAGCGGCGGTGCTTTCAAAG |
| 4-0.04     | CACGTTCTACCTATGATTCCCAGCGGCGGTGCTTTCAAAG |
| 4-0.04     | CACGTTCTACCTATGATTCCCAGCGGCGGTGCTTTCAAAG |
|            | ***** * * * * * * * * * * * * * * *      |

### TALENs+ODN 1-3

|    |                                          |
|----|------------------------------------------|
| WT | CACGTTCTACCTATGATTCCCAGCGGCGGTGCTTTCAAAG |
|----|------------------------------------------|

WT CACGTTCTACCTATGATTTCCACGCGGGTGCTTTCAAAG  
16-0.12 -----CAGCGGCGGTGCTTTCAAAG  
12-0.09 CACGTTCTACCTATGATTTCCACGCGGTGGTGCTTTCAAAG  
12-0.09 CACGTTCTGCCTATGATTTCCACGCGGGTGCTTTCAAAG  
11-0.08 CACGTTCTACCTATGATTTCCACGACGCGGTGCTTTCAAAG



|        |                                          |
|--------|------------------------------------------|
| 9-0.06 | CACGTTCTACCTATGATTCCCAGCGGCGGTGCTTTCAAAG |
| 8-0.06 | CACGTTCTACCTATGATTCCCAGCGGCGGTACTTTCAAAG |
| 7-0.05 | CACGTTCTACCTATGATTCCCAGCGGCGGTGCTTTCAAAG |
| 7-0.05 | CACGTTCTACCTATGATTCCCAGCGGCGGTCTTTCAAAG  |

\* \* \* \* \*

# **TALENS+ODN 3-3**

|             |                                           |
|-------------|-------------------------------------------|
| WT          | CACGTTCTACCTATGATTCCCAGCGGCGGTGCTTTCAAAG  |
| 13010-97.09 | CACGTTCTACCTATGATTCCCAGCGGCGGTGCTTTCAAAG  |
| 11-0.08     | CACGTTCTACCTATGATTCCCAGCGGTGGTGTCTTTCAAAG |
| 9-0.06      | CACGTTCTACCTA---TTCCCAGCGGCGGTGCTTTCAAAG  |
| 9-0.06      | CACGTTCTACCTATGATTCCCAGCGGCGGTCTTTCAAAG   |
| 8-0.05      | CACGTTCTGCCTATGATTCCCAGCGGCGGTGCTTTCAAAG  |
| 8-0.05      | CACGTTCTACCTA--ATTCCCAGCGGCGGTGCTTTCAAAG  |
| 7-0.05      | CACGTTCTACCTATGATTCCCAGCGGCGGTGCTCTCAAAG  |

\*\*\*\*\* \* \* \* \* \*\*\*\*\* \* \* \* \* \*

# **Only ODN 1-1**

|             |                                          |
|-------------|------------------------------------------|
| WT          | CACGTTCTACCTATGATTCCCAGCGGCGGTGCTTTCAAAG |
| 12343-97.23 | CACGTTCTACCTATGATTCCCAGCGGCGGTGCTTTCAAAG |
| 14-0.11     | CACGTTCTGCCTATGATTCCCAGCGGCGGTGCTTTCAAAG |
| 9-0.07      | CACGTTCTACCTATGATTCCCAGCGGCGGTCTTTCAAAG  |
| 7-0.05      | CACGTTCTACCTATGATTCCCAGCGGCAGTGCTTTCAAAG |
| 7-0.05      | CACGTTCTACCTATGATTCCAGCGGCGGTGCTTTCAAAG  |
| 7-0.05      | CACGTTCTACCTATAATTCCCAGCGGCGGTGCTTTCAAAG |

\*\*\*\*\* \* \* \* \* \*\*\*\*\* \* \* \* \* \*

# **Only ODN 1-2**

|             |                                          |
|-------------|------------------------------------------|
| WT          | CACGTTCTACCTATGATTCCCAGCGGCGGTGCTTTCAAAG |
| 11596-96.98 | CACGTTCTACCTATGATTCCCAGCGGCGGTGCTTTCAAAG |
| 16-0.13     | CACGTTCTACCTATGATTCCCAGCGGCGGTGCTTTCAAAG |
| 12-0.10     | CACGTTCTACCTATGATTCCCAGCGGCGGTCTTTCAAAG  |
| 11-0.09     | CACGTTCTACCTATGATTCCCAGCGGCGGTACTTTCAAAG |
| 10-0.08     | CACGTTCTACCTATGATTCCCAGCGGCGGTGCTTGCAAAG |
| 7-0.05      | CACGTTCTGCCTATGATTCCCAGCGGCGGTGCTTTCAAAG |
| 7-0.05      | CACGTTCTACCTATGATTCCCAGCGGCAGTGCTTTCAAAG |
| 7-0.05      | CACGTTCTACCTATGATTCCCAGCTGCGGTGCTTTCAAAG |
| 6-0.05      | CACGTTCTACCTATGACTCCCAGCGGCGGTGCTTTCAAAG |
| 6-0.05      | CACGTTCTACCTATGATTCCCAGTGCGGTGCTTTCAAAG  |
| 6-0.05      | CACGTTCTACCTATAATTCCCAGCGGCGGTGCTTTCAAAG |

\*\*\*\*\* \* \* \* \* \* \* \* \* \* \* \* \* \* \* \*

# **Only ODN 1-3**

|             |                                           |
|-------------|-------------------------------------------|
| WT          | CACGTTCTACCTATGATTCCCAGCGGCGGTGCTTTCAAAG  |
| 13691-97.17 | CACGTTCTACCTATGATTCCCAGCGGCGGTGCTTTCAAAG  |
| 14-0.09     | CACGTTCTACCTATGATTCCCAGCGGCGGTGCTTTCAAAG  |
| 10-0.07     | CACGTTCTACCTATGATTCCCAGCGGCGGTCTTTCAAAG   |
| 10-0.07     | CACGTTCTGCCTATGATTCCCAGCGGCGGTGCTTTCAAAG  |
| 10-0.07     | CACGTTCTACCTACGATTCCCAGCGGCGGTGCTTTCAAAG  |
| 10-0.07     | CACGTTCTACCTATGATTCCCAGCGGCGGTACTTTCAAAG  |
| 9-0.06      | CACGTTCTACCTATGATTCCCTGCGGCGGTGCTTTCAAAG  |
| 8-0.05      | CACGTTCTACCTATGATTCCCTAGCGGCGGTGCTTTCAAAG |
| 8-0.05      | CACGTTCTACCTAGGATTCCCAGCGGCGGTGCTTTCAAAG  |

\*\*\*\*\* \* \* \* \* \* \* \* \* \* \* \* \* \* \* \*

# **Only ODN 2-1**

|             |                                          |
|-------------|------------------------------------------|
| WT          | CACGTTCTACCTATGATTCCCAGCGGCGGTGCTTTCAAAG |
| 19123-97.52 | CACGTTCTACCTATGATTCCCAGCGGCGGTGCTTTCAAAG |
| 12-0.06     | CACGTTCTGCCTATGATTCCCAGCGGCGGTGCTTTCAAAG |
| 10-0.05     | CACGTTCTACCTGTGATTCCCAGCGGCGGTGCTTTCAAAG |
| 10-0.05     | CACGTTCTACCTATGATTCCCAGCGGCGGTCTTTCAAAG  |

\*\*\*\*\* \* \* \* \* \* \* \* \* \* \* \* \* \* \* \*

# **Only ODN 2-2**

|    |                                          |
|----|------------------------------------------|
| WT | CACGTTCTACCTATGATTCCCAGCGGCGGTGCTTTCAAAG |
|----|------------------------------------------|

|            |                                          |
|------------|------------------------------------------|
| 16407-96.7 | CACGTTCTACCTATGATTCCCAGCGGCGGTGCTTTCAAAG |
| 19-0.11    | CACGTTCTGCCTATGATTCCCAGCGGCGGTGCTTTCAAAG |
| 18-0.10    | CACGTTCTACCTATGATTCCCAGCGGCGGTACTTTCAAAG |
| 16-0.09    | CACGTTCTACCTATGATTCCCAGTGGCGGTGCTTTCAAAG |
| 16-0.09    | CACGTTCTACCTATGATTCCCAGCGGCGATGCTTTCAAAG |
| 15-0.08    | CACGTTCTACCTATGATTCCCAGCGGCGGTCTTTCAAAG  |
| 13-0.07    | CACGTTCTACCTATGATTCCCAGCGGCGGTGCTTGCAAAG |
| 11-0.06    | CACGTTCTACCTATGATTCCAGCGGCGGTGCTTTCAAAG  |
| 11-0.06    | CACGTTCTACCTATGATTCCAGCGGCGGTGCTTTCAAAG  |
| 11-0.06    | CACGTTCTACCTATGATTCCCAGCGGCGGTGCTTCAAAG  |
| 10-0.05    | CACGTTCTACCTATGATTCCCGCGGCGGTGCTTTCAAAG  |
| 9-0.05     | CACGTTCTACCTATGATTCCCAGCGGCGGTGCTTTCAAAG |
| 9-0.05     | CACGTTCTACCTATGATTCCCTGCGGCGGTGCTTTCAAAG |
|            | ***** ***** * * *** * *** *****          |

# **Only ODN 2-3**

|             |                                          |
|-------------|------------------------------------------|
| WT          | CACGTTCTACCTATGATTCCCAGCGGCGGTGCTTTCAAAG |
| 18777-97.19 | CACGTTCTACCTATGATTCCCAGCGGCGGTGCTTTCAAAG |
| 16-0.08     | CACGTTCTGCCTATGATTCCCAGCGGCGGTGCTTTCAAAG |
| 15-0.07     | CACGTTCTACCTATGATTCCCAGCGGCGGTGCTTTCAAAG |
| 14-0.07     | CACGTTCTACCTATGATTCCCAGCGGCGGTCTTTCAAAG  |
| 14-0.07     | CACGTTCTACCTATGATTCCAGCGGCGGTGCTTTCAAAG  |
| 12-0.06     | CACGTTCTACCTATGATTCCCAGCGGCGGTACTTTCAAAG |
| 11-0.05     | CACGTTCTACCTATGATTCCCAGCGGCGGTGATTTCAAAG |
| 11-0.05     | CACGTTCTACCTATGATTCCCAGTGGCGGTGCTTTCAAAG |
| 10-0.05     | CACGTTCTACCTATGATTCCCAGCGGCGGCGCTTTCAAAG |
| 10-0.05     | CACGTTCTACCTATGATTCCCTGCGGCGGTGCTTTCAAAG |
|             | ***** ***** * *** * *****                |

# **Only ODN 3-1**

|             |                                          |
|-------------|------------------------------------------|
| WT          | CACGTTCTACCTATGATTCCCAGCGGCGGTGCTTTCAAAG |
| 12013-96.71 | CACGTTCTACCTATGATTCCCAGCGGCGGTGCTTTCAAAG |
| 15-0.12     | CACGTTCTACCTAT---TCCCAGCGGCGGTGCTTTCAAAG |
| 15-0.12a    | CACGTTCTACCTAT----CCAGCGGCGGTGCTTTCAAAG  |
| 14-0.11     | CACGTTCTACCCATGATTCCCAGCGGCGGTGCTTTCAAAG |
| 13-0.10     | CACGTTCTACCTATGATTCCCAGCGGCGGTGCTTTCAAAG |
| 12-0.09     | CACGTTCTGCCTATGATTCCCAGCGGCGGTGCTTTCAAAG |
| 10-0.08     | CACGTTCTACCTATGATTCCCAGCGGCGGTGCTTGCAAAG |
| 8-0.06      | CACGTTCTACCTATGACTCCCAGCGGCGGTGCTTTCAAAG |
| 8-0.06      | CACGTTCTACCTATGATTCCCTGCGGCGGTGCTTTCAAAG |
| 7-0.05      | CACGTTCTACCTATGATTCCCAGCGGCGGTCTTTCAAAG  |
| 7-0.05      | CACGTTCTACCTATGATTCCCAGCGGCGGTACTTTCAAAG |
| 7-0.05      | CACGTTCTACCTATGATTCCCAGCTGCGGTGCTTTCAAAG |
| 7-0.05      | CACGTTCTACCTATGATTCCCAGCTGCGGTGCTTTCAAAG |
|             | ***** ** ** * * * * * * * * *            |

# **Only ODN 3-2**

|             |                                          |
|-------------|------------------------------------------|
| WT          | CACGTTCTACCTATGATTCCCAGCGGCGGTGCTTTCAAAG |
| 15618-97.08 | CACGTTCTACCTATGATTCCCAGCGGCGGTGCTTTCAAAG |
| 20-0.12     | CACGTTCTACCTAT----CCAGCGGCGGTGCTTTCAAAG  |
| 15-0.09     | CACGTTCTGCCTATGATTCCCAGCGGCGGTGCTTTCAAAG |
| 14-0.08     | CACGTTCTACCTATGATTCCCAGCGGCGGTGCTTTCAAAG |
| 13-0.08     | CACGTTCTACCTATGATTCCCAGCAGCGGTGCTTTCAAAG |
| 12-0.07     | CACGTTCTACCTATGATTCCCAGCGGCGGTCTTTCAAAG  |
| 11-0.06     | CACGTTCTACCTATGATTCCCAGTGGCGGTGCTTTCAAAG |
| 10-0.06     | CACGTTCTACCTACGATTCCCAGCGGCGGTGCTTTCAAAG |
| 10-0.06     | CACGTTCTACCTATGATTCCCAGCGGCGGTACTTTCAAAG |
| 9-0.05      | CACGTTCTACCTATGATTCCCAGCGGCGGTGCTTTCAAAG |
|             | ***** ***** ***** ** * * * * *           |

# **Only ODN 3-3**

|             |                                          |
|-------------|------------------------------------------|
| WT          | CACGTTCTACCTATGATTCCCAGCGGCGGTGCTTTCAAAG |
| 15440-97.16 | CACGTTCTACCTATGATTCCCAGCGGCGGTGCTTTCAAAG |
| 23-0.14     | CACGTTCTACCTATGATTCCCAGCGGCGGTGCTTTCAAAG |
| 21-0.13     | CACGTTCTGCCTATGATTCCCAGCGGCGGTGCTTTCAAAG |
| 18-0.11     | CACGTTCTACCTAT----CCAGCGGCGGTGCTTTCAAAG  |
| 12-0.07     | -----CACGCGGTGCTTTCAAAG                  |

|         |                                           |
|---------|-------------------------------------------|
| 10-0.06 | CACGTTCTACCTATGATTCCCTAGCGGCGGTGCTTTCAAAG |
| 8-0.05  | CACGTTCTACCTATGATTCCAGCGGCGGTGCTTTCAAAG   |
|         | *****                                     |
